1 **TITLE**

2 Competitive inter-species interactions underlie the increased antimicrobial tolerance in multispecies  
3 brewery biofilms

4 **RUNNING TITLE**

5 Competition underlies antimicrobial tolerance

6 **AUTHORS**

7 Ilse Parijs<sup>1</sup>, Hans P. Steenackers<sup>1#</sup>

8

9 1 Centre of Microbial and Plant Genetics (CMPG), Department of Microbial and Molecular Systems,  
10 KU Leuven, Kasteelpark Arenberg 20 - box 2460, B-3001 Leuven, Belgium.

11 # Corresponding author. Mailing address: CMPG, KU Leuven, Kasteelpark Arenberg 20 – box 2460, B-  
12 3001 Leuven, Belgium. Phone: +32 16 32 16 31. Fax: +32 16 32 19 66. E-mail:

13 [hans.steenackers@kuleuven.be](mailto:hans.steenackers@kuleuven.be)

14

15 The authors declare no conflict of interest.

16 **ABSTRACT**

17 Genetic diversity often enhances the tolerance of microbial communities against antimicrobial  
18 treatment. However the sociobiology underlying this antimicrobial tolerance remains largely  
19 unexplored. Here we analyze how inter-species interactions can increase antimicrobial tolerance. We  
20 apply our approach to 17 industrially-relevant multispecies biofilm models, based on species isolated  
21 from 58 contaminating biofilms in three breweries. Sulfathiazole is used as antimicrobial agent  
22 because it shows the highest activity out of 22 biofilm inhibitors tested. Our analysis reveals that  
23 competitive interactions dominate among species within brewery biofilms. We show that  
24 antimicrobial treatment can reduce the level of competition and therefore cause a subset of species  
25 to bloom. The result is a lower percentage inhibition of these species and increased tolerance. In  
26 addition, we show that the presence of competing species can also directly enhance the inherent  
27 tolerance of microbes to antimicrobial treatment, either because species protect each other or  
28 because they induce specific tolerance phenotypes as a response to competitors (i.e. competition  
29 sensing). Overall, our study emphasizes that the dominance of competitive interactions is central to  
30 the enhanced antimicrobial tolerance of the multispecies biofilms and that the activity of  
31 antimicrobials against multispecies biofilms cannot be predicted based on their effect against mono-  
32 cultures.

## 33 INTRODUCTION

34 Microbes commonly live in surface-attached communities embedded in a self-produced matrix,  
35 known as biofilms, which cause major problems and economic losses within industrial and medical  
36 sectors (Hall-Stoodley *et al.*, 2004). The majority of natural biofilms contain multiple species and  
37 harbor different functions and abilities compared to their monospecies counterparts (Stoodley *et al.*,  
38 2002; Elias and Banin, 2012). One hallmark of multispecies biofilms is their increased tolerance against  
39 antimicrobial agents (Baffone *et al.*, 2011; Simões *et al.*, 2010; Shakeri *et al.*, 2007; Kumar and Peng,  
40 2015; Jagmann *et al.*, 2015; Adam *et al.*, 2002; Lopes *et al.*, 2012; Leriche *et al.*, 2003; Whiteley *et al.*,  
41 2001; Luppens *et al.*, 2008; Wang *et al.*, 2013; Schwering *et al.*, 2013; Van der Veen and Abee, 2011;  
42 Simões *et al.*, 2009; Harriott and Noverr, 2009; Lee *et al.*, 2014). Although different species within  
43 biofilms are closely associated and are expected to strongly interact with each other (Elias and Banin,  
44 2012), little is known about how these interactions affect antimicrobial tolerance. Indeed, most  
45 previous studies focused on the overall tolerance of multispecies biofilms, without looking at the  
46 contributions of individual species. In the limited cases that multispecies composition before and after  
47 treatment was determined, the types of interactions and their interdependency with antimicrobial  
48 treatment and tolerance were generally not investigated (Harriott and Noverr, 2009; Van der Veen  
49 and Abee, 2011; Simões *et al.*, 2009; Whiteley *et al.*, 2001; Leriche *et al.*, 2003; Luppens *et al.*, 2008;  
50 Wang *et al.*, 2013; Schwering *et al.*, 2013).

51 Interactions can be cooperative or competitive in nature. Cooperative interactions for  
52 example involve the secretion of enzymes (Rakoff-Nahoum *et al.*, 2016) or metabolic cross-feeding  
53 (Harcombe, 2010). Social evolution theory defines a cooperative adaptation in one species as a  
54 phenotype that increases the fitness of another species and that evolved at least in part because of  
55 this effect (Mitri and Foster, 2013; Foster and Bell, 2012; West *et al.*, 2007). This implies that both  
56 species are benefitting from the interaction, since it is difficult to see how an adaptation that helps  
57 another species can evolve when it has a fitness cost to the helping species. The *cooperation criterion*

58 therefore states that an observed interaction is only consistent with a cooperative adaptation if the  
59 total productivity in co-culture is higher than the sum of the mono-culture productivities (which is the  
60 null for no interaction) and both species increase their cellular productivity in co-culture vs. mono-  
61 culture (Mitri and Foster, 2013). Higher order cooperative interactions could potentially occur when  
62 sets of three, four or more species engage in loops of mutually beneficial interactions. In addition to  
63 evolved cooperation, also accidental positive effects can occur (no positive feedback loop), for  
64 example when waste products in a focal species can be used as resource by another species. This can  
65 result in a commensal interaction, in which there is no fitness effect in one direction, or can happen  
66 within a competitive association (*vide infra*).

67       Whenever one or both species experience a disadvantage in co-culture, competition is  
68 dominant. Competition is expected to be favoured when coexisting species have overlapping  
69 metabolic niches, are spatially mixed and when cell density is high relative to the available resources  
70 (Ghoul and Mitri, 2016). Phenotypes involved in microbial competition can be accidental in nature or  
71 have evolved for this purpose. The latter phenotypes are called competitive adaptations and include  
72 (i) strategies to take away resources from competitors (exploitative competition), for example by fast-  
73 but-wasteful-growth (Pfeiffer *et al.*, 2001), production of nutrient-scavenging molecules (Scholz and  
74 Greenberg, 2015), or superior positioning within the niche (Kim *et al.*, 2014), and (ii) strategies to  
75 directly fight with competing species (interference competition), for example by production of  
76 antimicrobials (Riley and Gordon, 1999) or contact dependent inhibition (Russell *et al.*, 2014; Lories *et al.*,  
77 2017). Competition can be further characterized by comparing the observed productivity in co-  
78 culture with the weighted average productivity of the constituent species in mono-culture. This allows  
79 to determine to which extent inter-species competition differs from intraspecific competition. As  
80 described below, this difference is called the *biodiversity effect* and is constituted of a *selection effect*  
81 and *complementarity effect*. Previously, this concept has been frequently applied in plant ecology  
82 (Cardinale *et al.*, 2007; Morin *et al.*, 2011; Polley *et al.*, 2003; Spehn *et al.*, 2005; Loreau and Hector,  
83 2001).

84           Here we combine the *cooperation criterion* and *biodiversity effect* to investigate how inter-  
85 species interactions underlie the increased tolerance of multispecies biofilms. We apply our approach  
86 to industrially-relevant multispecies biofilm models consisting of combinations of species isolated  
87 from contaminating biofilms in breweries. In the brewing industry, undesired biofilms can be  
88 associated with spoilage organisms, cause corrosion and reduce process efficiency. Several stages of  
89 the brewing process, including the pasteurization, the storage and bottling of the beer, are known to  
90 be affected by biofilms and the eradication of these biofilms remains highly challenging (Storgards and  
91 Tapani, 2006; Mamvura and Iyuke, 2011; Maifreni *et al.*, 2015). Improved understanding of  
92 antimicrobial tolerance is thus a prerequisite for designing more effective brewery sanitation  
93 procedures.

94           Our analysis reveals that a complex interplay between antimicrobial treatment and genetic  
95 diversity underlies the commonly-observed increased tolerance of multispecies biofilms. Consistent  
96 with previous work in other microbial communities (Foster and Bell, 2012; Rivett *et al.*, 2016; Oliveira  
97 *et al.*, 2015), we show that competitive interactions dominate among species within the brewery  
98 biofilms. We then show that this dominance of competitive interactions is central to the enhanced  
99 antimicrobial tolerance of the multispecies biofilms. Antimicrobial treatment, if incomplete, can  
100 reduce the level of competition and therefore cause a subset of species to bloom. The result is a lower  
101 percentage inhibition of these species in the multispecies biofilm compared to the mono-culture  
102 biofilms, which appears -per definition- as increased tolerance. Complete inhibition of all species in  
103 the mixture would avoid this effect. However, our results further indicate that the presence of  
104 competing species can also directly enhance the inherent tolerance of microbes to antimicrobial  
105 treatment. Antimicrobials that are completely effective against mono-culture biofilms are thus not  
106 necessarily effective against the same species in co-culture. Overall this emphasizes that the activity  
107 of antimicrobials against multispecies biofilms cannot be predicted based on their effect against  
108 mono-cultures.

## 109 MATERIAL AND METHODS

### 110 Sampling

111 A total of 58 samples were collected from four breweries in Belgium between August and December  
112 2014, before and after cleaning in place (CIP). Sterile cotton swabs (Deltalab) were used for collection  
113 of biofilm material from approximately 25 cm<sup>2</sup> on different surfaces in the bottling plant, filtration  
114 room and storage room. After sampling, swabs were submerged in phosphate buffered saline (PBS),  
115 which consists of 8.8 g/L NaCl, 1.24 g/L K<sub>2</sub>HPO<sub>4</sub>, and 0.39 g/L KH<sub>2</sub>PO<sub>4</sub> (pH 7.4). Biofilm material was  
116 removed from the swabs by 3x 30 s vortexing and sonication at 45 kHz, 80 W. 900 µl of the PBS solution  
117 with the biofilm material was frozen at -80°C in 50% glycerol. 100 µl was plated out in dilution 10<sup>0</sup> to  
118 10<sup>-8</sup> on plate count agar (PCA), which is composed of 5 g/L peptone, 2.5 g/L yeast extract, 1 g/L glucose  
119 and 15 g/L agar. The plates were incubated at 25 °C for 7 days. The total microbial load was determined  
120 by counting the colonies on the plates and determining the CFU/cm<sup>2</sup>.

### 121 Identification of culturable species

122 Colonies growing on the PCA plates were identified by partial 16S rRNA or ITS gene sequencing. For  
123 bacteria, colony PCR using Taq DNA polymerase (Life Technologies) was performed on the 16S rRNA  
124 gene, which was targeted by primers BSF8/20 and BSR1541/20 (Cai *et al.*, 2003). The following PCR  
125 program was used: 96°C for 6 min, 35 cycles of (i) denaturation at 96°C for 1 min, (ii) annealing at  
126 47.5°C for 1 min, and (iii) elongation at 72°C for 90s, and a final elongation at 72°C for 6 min.  
127 Afterwards, the PCR products were loaded on a 1X agarose gel, which was run for 1 hour at 125V and  
128 400A. The band at 1500 bp was cut out and the DNA was extracted by using the GenElute™ Gel  
129 Extraction Kit (Sigma-Aldrich). Sanger sequencing was performed on the extracted DNA using primer  
130 BSF8/20 (GATC Biotech). The resulting sequence was blasted against the NCBI gene database to  
131 identify the closest relative of each colony. For yeast identification, the same protocol was followed,  
132 using primers ITS1 and ITS4 (White *et al.*, 1990), with an annealing temperature of 60°C and an  
133 elongation time of 1 min. The resulting PCR fragment was 330 bp.

## 134 **Defined multispecies biofilm models**

135 Defined multispecies biofilm models combined a fixed number of culturable species that were isolated  
136 from the same sample. Hereto, each species was grown in liquid PCA culture for 48 hours at 25 °C  
137 under shaking conditions. These species were combined with a starting density of 1000 CFU/ml for  
138 each species and grown in 1/20 Trypticase Soy Broth in 96 well plates. Similarly, monospecies biofilms  
139 were set up with a starting density of 1000 CFU/ml. After incubation for 4 days at 25°C, the amount  
140 of living cells in the biofilm formed on the bottom of the 96 well plates was quantified by plate  
141 counting. First, the free-living cells were removed from the wells. Second, the biofilm on the bottom  
142 of the wells was scraped off in 200 µl PBS and diluted appropriately. Finally, the diluted solutions with  
143 biofilm cells were plated out on PCA plates and incubated at 25°C for 2-5 days. Colonies on the plates  
144 were counted and the CFU/cm<sup>2</sup> was determined. In the multispecies biofilms, a distinction was made  
145 between the different species based on colony morphology.

## 146 **Study of inter-species interactions: cooperation criterion and biodiversity effect**

147 15 different defined multispecies biofilms were grown as described above. To determine if inter-  
148 species interactions are cooperative or competitive, the cooperation criterion was applied. This  
149 criterion requires that the biofilm growth for all species in co-culture is higher than their respective  
150 biofilm growth in mono-culture (Mitri and Foster, 2013).

151 To further characterize the ecological influences on interactions, the biodiversity effect was  
152 calculated according to the formula below, in which  $N\overline{\Delta RY\bar{M}}$  measures the complementarity effect  
153 and  $N cov(\Delta RY, M)$  measures the selection effect (Loreau and Hector, 2001).

$$154 \quad \Delta Y = Y_O - Y_E = N\overline{\Delta RY\bar{M}} + N cov(\Delta RY, M)$$

155  $M_i$  = biofilm growth of species *i* in mono-culture

156  $Y_{O,i}$  = observed biofilm growth of species *i* in co-culture

157  $Y_O = \sum_i Y_{O,i}$  = total observed biofilm growth in co-culture

158  $RY_{E,i}$  = expected relative biofilm growth of species  $i$  in co-culture, which is its proportion  
159 inoculated

160  $RY_{O,i} = Y_{O,i}/M_i$  = observed relative biofilm growth of species  $i$  in co-culture

161  $Y_{E,i} = RY_{E,i}M_i$  = expected biofilm growth of species  $i$  in co-culture

162  $Y_E = \sum_i Y_{E,i}$  = total expected biofilm growth in co-culture

163  $\Delta Y = Y_O - Y_E$  = deviation from the total expected biofilm growth in the co-culture (=   
164 biodiversity effect)

165  $\Delta RY_i = RY_{O,i} - RY_{E,i}$  = deviation from expected relative biofilm growth of species  $i$  in co-  
166 culture

167  $N$  = number of species in co-culture

168

169 The cooperation criterion requires the total multispecies inoculation density to be equal to  
170 the sum of the inoculation densities of the mono-culture biofilm. In contrast, the definition of the  
171 biodiversity effect imposes that the inoculation density of each species in the multispecies biofilms  
172 should be its inoculation density in mono-culture, divided by the number of species that are present  
173 in the multispecies biofilm. All multispecies biofilm models in this study were grown in both set-ups  
174 and no differences in final growth were observed. Inoculation densities are indeed not expected to  
175 have large effects when biofilms are grown to stationary phase (Foster and Bell, 2012).

## 176 **Biofilm inhibitor screening**

177 A library of 96 inhibitors that were reported in literature or *in house* developed and that are known to  
178 affect biofilm specific processes was composed. Based on commercial availability, low cost and  
179 toxicity, 22 compounds were selected for a one-replicate preventive screening against 17 undefined  
180 multispecies biofilm, grown directly from the frozen samples. Inhibitors were dissolved in dimethyl  
181 sulfoxide (DMSO) at 100  $\mu\text{M}$  and their activity was tested as described in the next paragraph. In a next  
182 step, 12 of the 22 inhibitors were selected based on their activity and chemical properties and were  
183 screened against 9 of the 17 frozen sample multispecies biofilms using a range of twofold serial diluted  
184 concentrations between 800 and 0.4  $\mu\text{M}$ . This allows calculating the BIC50, which is defined as the  
185 concentration ( $\mu\text{M}$ ) of inhibitor needed to inhibit 50% of the biofilm growth.



186 The undefined multispecies biofilms were set up with a 1000 CFU/ml start inoculum taken  
187 directly from the frozen isolated biofilm sample and grown in 1/20 Trypticase Soy Broth on the pegs  
188 of the Calgary biofilm device for 4 days at 25 °C. Quantification of biofilm biomass was done by crystal  
189 violet staining (Ceri *et al.*, 1999). Briefly, the pegs were first washed in 200 µl PBS and then stained for  
190 30 minutes with 200 µl 0.1% (w/v) crystal violet in an isopropanol/methanol/PBS solution (v/v 1:1:18).  
191 Next, the excess stain was washed off the pegs in 200 µl distilled water and the pegs were left to dry  
192 for 30 minutes. Finally, the pegs were destained in 200 µl 30 % glacial acetic acid and biofilm matrix  
193 was quantified by measuring the OD<sub>570</sub> of each well using a Synergy MX multimode reader (Biotek,  
194 Winooski, VT). The BIC50 was determined for each inhibitor that was tested in a range of  
195 concentrations by nonlinear curve fitting (GraphPad Prism software, version 6).

#### 196 **Multispecies biofilm inhibition by sulfathiazole**

197 Defined mono- and multispecies biofilms were set up in 96 well plates as previously described and at  
198 the start of the incubation, sulfathiazole (100 µM in DMSO) or an equal amount of DMSO was added.  
199 Biofilms were grown and quantified by plating out as described previously. Inter-species interactions  
200 were determined as described above. Tolerance to sulfathiazole was calculated in mono- and  
201 multispecies biofilms using the following formulas:

$$202 \quad \% \text{ Tolerance (species } i, \text{ mono)} = \frac{\text{Treated biofilm growth (species } i, \text{ mono)}}{\text{Untreated biofilm growth (species } i, \text{ mono)}} * 100$$

$$203 \quad \% \text{ Tolerance (species } i, \text{ multi)} = \frac{\text{Treated biofilm growth (species } i, \text{ multi)}}{\text{Untreated biofilm growth (species } i, \text{ multi)}} * 100$$

204

205

## 206 RESULTS

### 207 Construction of industrially relevant multispecies biofilm models

208 We started by setting up a series of *in vitro* multispecies biofilm models with relevance for the  
209 brewing-industry, that were further used throughout this study. Hereto, 103 biofilm samples isolated  
210 from different locations in several breweries were microbiologically characterized. The total bacterial  
211 load (CFU/cm<sup>2</sup>) varied between 10<sup>2</sup> and 10<sup>8</sup> before cleaning in place (CIP) and between 10<sup>1</sup> and 10<sup>9</sup>  
212 after CIP. As shown in Figure 1, the microbial contamination after CIP was reduced with less than 75%  
213 in 52% of the samples and was even increased in 24% of the samples, indicating that CIP is insufficient  
214 and that improved antimicrobial treatments are highly needed.

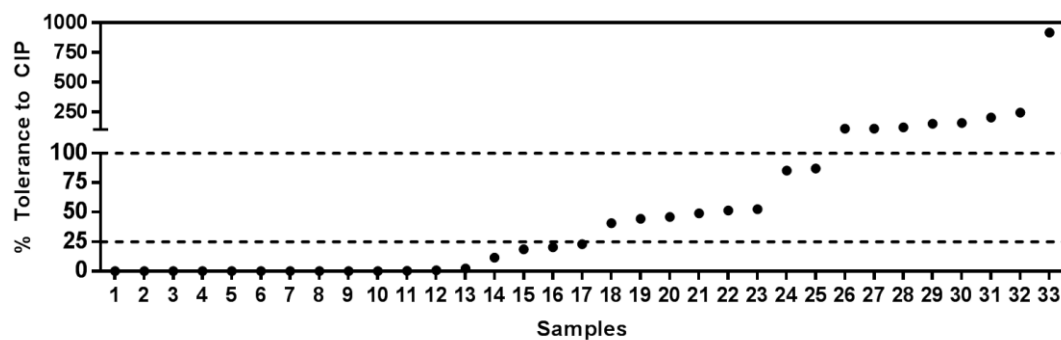

215  
216 **Figure 1:** % tolerance to CIP for 33 biofilms sampled from different locations in different breweries.

217

218 The genera of the closest known relatives of the culturable microbes were determined by  
219 partial 16S rRNA gene sequencing to characterize the microbial diversity (Table S1). The biofilm  
220 samples were mainly composed of *Pseudomonas* and *Raoultella* ssp. and also two beer spoiling  
221 organisms, *Pediococcus* and *Lactococcus*, were identified. Multispecies biofilm models were then  
222 constructed by combining species isolated from the same sample. Seventeen ‘undefined’ biofilm  
223 models were set up by directly inoculating part of the frozen isolated biofilm samples. These models  
224 were used to screen for broad-spectrum biofilm inhibitors. Because these biofilms likely contain  
225 unculturable species, for the study of inter-species interactions an additional 12 ‘defined’ multispecies  
226 biofilm models were constructed by inoculating equal ratios of 3 to 6 well-identified, culturable

227 species (originating from 8 samples taken before CIP and 4 samples taken after CIP). Several biofilms  
228 containing *Pseudomonas* and *Raoultella* spp. were included.

### 229 **Screening of biofilm inhibitors**

230 To study the tolerance of multispecies brewery biofilms, we sought to use a broad-spectrum  
231 antimicrobial with a large potential for application against brewery biofilms. Hereto, a library of 22  
232 biofilm inhibitors -with previously reported activity against mono-culture biofilms- was composed that  
233 target biofilm specific processes such as adhesion (Opperman *et al.*, 2009), dispersion (Barraud *et al.*,  
234 2006), EPS-production (Nithya *et al.*, 2011) and several others (Lynch and Abbanat, 2010). After an  
235 initial screening against 17 undefined multispecies biofilm models using a fixed concentration of 100  
236  $\mu\text{M}$  (data not shown), we selected 12 inhibitors, which were tested more thoroughly using multiple  
237 concentrations. Specifically, we performed a preventive screening against 9 undefined multispecies  
238 biofilm models directly grown from the frozen brewery biofilm samples. Crystal violet staining was  
239 used to measure the amount of biofilm formed and the 50% inhibitory concentrations (BIC50) were  
240 calculated for each biofilm model (Figure 2). Sulfathiazole was found to have the broadest activity-  
241 spectrum against the brewery biofilms and was therefore selected for further study. This inhibitor has  
242 been described previously to interfere with c-di-GMP biosynthesis in *E. coli* biofilms (Antoniani *et al.*,  
243 2010). C-di-GMP has been reported to play a crucial role in biofilm formation by a wide range of  
244 bacterial species, which might explain the broad-spectrum activity of this compound (Cotter and  
245 Stibitz, 2007; Hengge, 2009; Romling *et al.*, 2013).

246

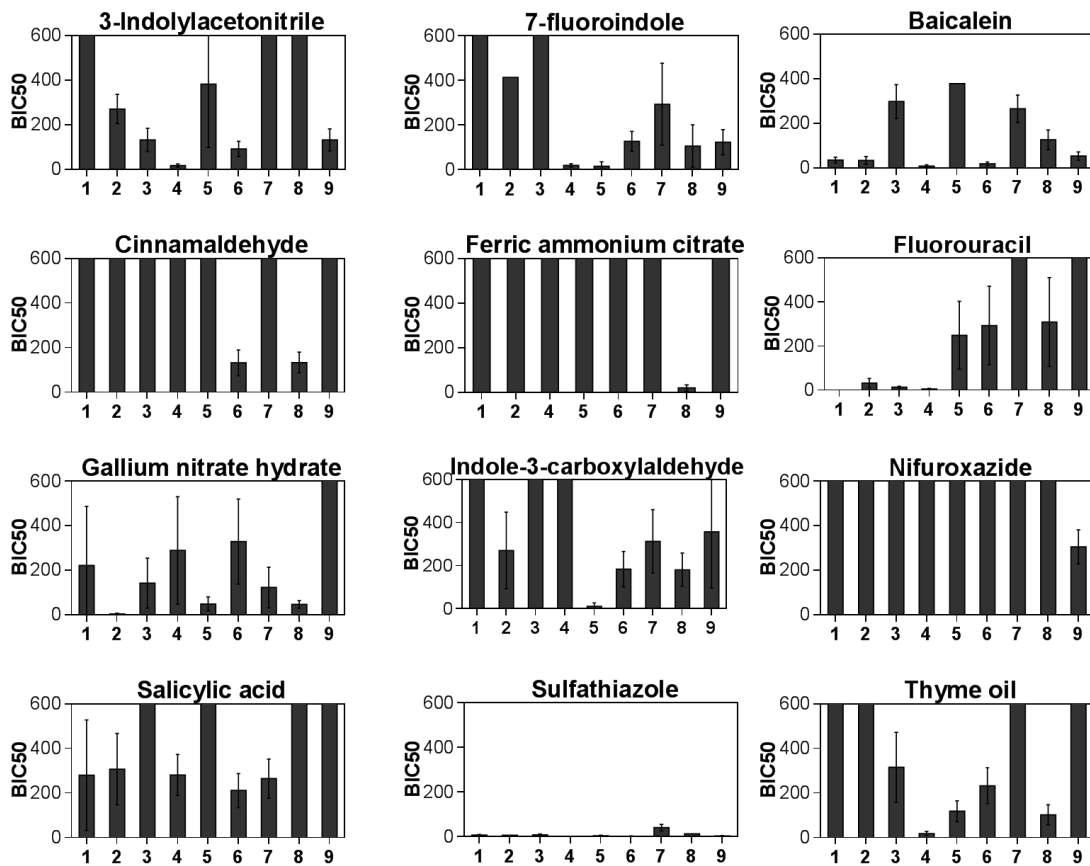

247

248 **Figure 2:** BIC50 values of 12 biofilm inhibitors against 9 undefined biofilms (shown as mean with standard  
249 deviation of three biological repeats). BIC50 is defined as the concentration ( $\mu\text{M}$ ) of inhibitor needed to prevent  
250 biofilm growth with 50%. Compounds with BIC50 values over 600  $\mu\text{M}$  are considered ineffective and are not  
251 shown.

252

## 253 Effect of inter-species interactions on biofilm growth and composition

254 We first aimed to determine the role of inter-species interactions in multispecies biofilms, irrespective  
255 of antimicrobial treatment. Hereto, we performed a systematic classification of the interactions in 12  
256 defined biofilm models, each consisting of 3 to 6 culturable species, by using two complementary  
257 approaches: (i) *cooperation criterion* and (ii) *biodiversity effect*.

258 The *cooperation criterion* was used to classify interactions as cooperative or competitive. For  
259 all biofilm models, the number of biofilm cells of each species ( $\text{CFU}/\text{cm}^2$ ) in mono-culture was  
260 compared to the cell count of each species in co-culture (Figure 3). Most species performed worse in  
261 co-culture than in mono-culture indicating that competitive interactions are dominant. The increased  
262 cellular productivity observed for a subset of the species in few of the multispecies biofilms (e.g. for 3

263 out of 4 species in model 5) could be due to exploitation of the remaining, suppressed species,  
 264 however, cooperation between these species cannot be ruled out. In summary, all models were  
 265 characterized by competitive interactions that cause some or all species to perform worse than in  
 266 mono-culture.

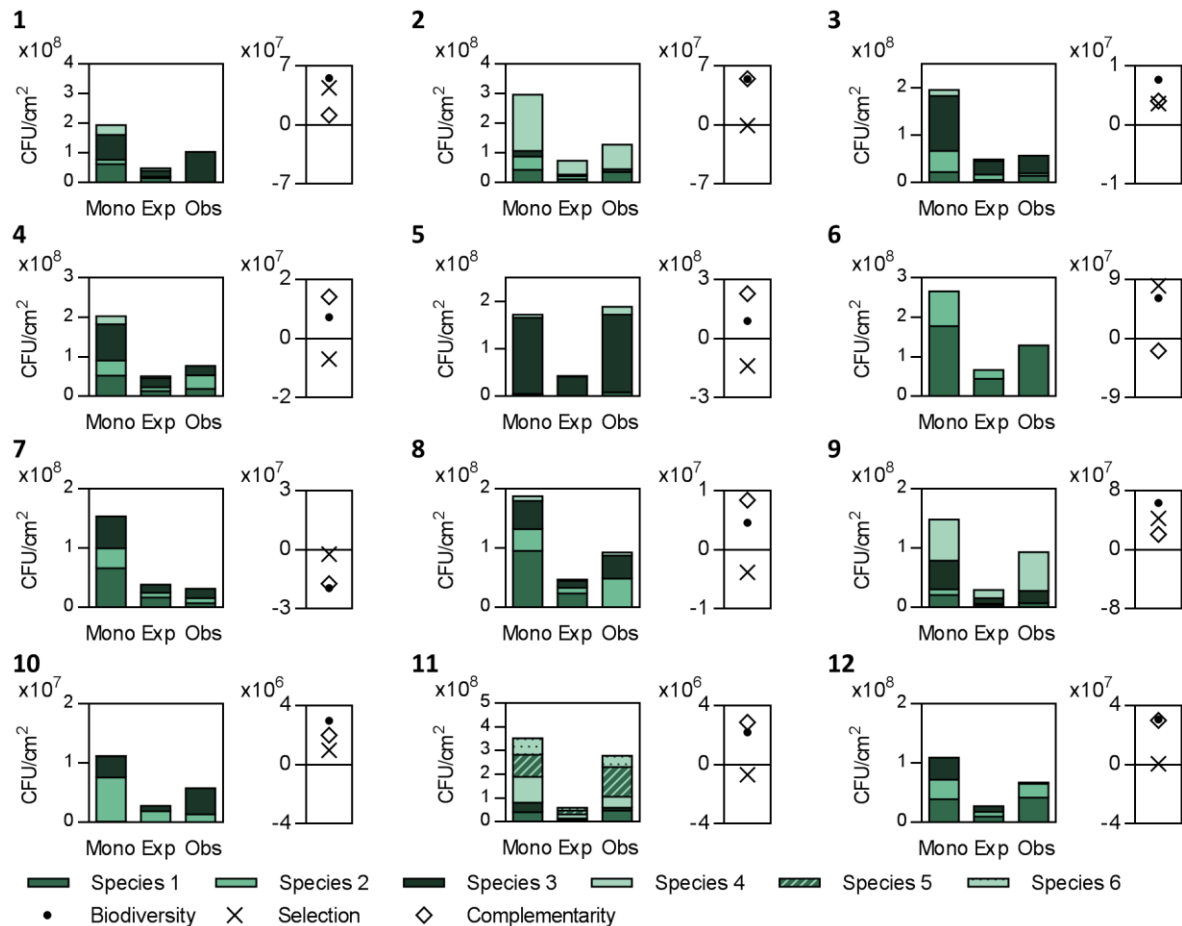

267  
 268 **Figure 3:** Mono-culture growth (Mono), expected (Exp) and observed (Obs) multispecies composition and the  
 269 biodiversity, selection and complementarity effect for 1 representative repeat of 12 defined multispecies biofilm  
 270 models.

271  
 272 To further characterize competition, the *biodiversity effect* was measured (Loreau and Hector,  
 273 2001). When inter-species competition is equal to intra-specific competition, the observed  
 274 productivity in co-culture is expected to be equal to the average productivity of the constituent species  
 275 in mono-culture, weighted by the inoculation frequencies. The biodiversity effect is defined as the  
 276 difference between the observed and expected multispecies biofilm productivity and is thus a  
 277 measure for the extent to which inter-species interactions deviate from intra-specific interactions. The

278 observed productivity of the 12 model biofilms (CFU/cm<sup>2</sup>) was compared to the expected biofilm  
279 growth. In the majority of the multispecies biofilm models (75%), the total amount of biofilm formed  
280 was higher than expected, as indicated by a positive biodiversity effect, while the remaining 25% of  
281 the cases were characterized by a negative biodiversity effect.

282 A positive biodiversity effect can either be caused by selection of the best biofilm former or  
283 by a (partial) niche separation alleviating competition; conversely a negative biodiversity effect can be  
284 caused by selection of the worse biofilm former or by strong interference competition. To distinguish  
285 between both possibilities, Loreau & Hector (2001) partitioned the biodiversity effect into a selection  
286 and complementarity effect (Material and Methods). Selection occurs when the extent to which the  
287 relative productivity in co-culture vs. mono-culture deviates from expected is non-randomly related  
288 to the productivity in mono-culture and is measured by a covariance function. Positive selection is  
289 indicative of the dominance of the best mono-culture biofilm formers and occurred in 33,3% of the  
290 multispecies biofilm models. Negative selection suggests the opposite and appeared in the remaining  
291 67,7% of the multispecies biofilm models. If only selection effects take place, the total relative  
292 productivity (sum of relative productivities of all species) is 1, meaning that an increase in productivity  
293 in one species is compensated by a decrease in productivity of another species. However, if the total  
294 relative productivity is higher or lower than 1 over- or underyielding occurs, which is defined as the  
295 complementarity effect. This effect measures whether the relative amount of biofilm formed in co-  
296 culture vs. mono-culture is on average higher or lower than expected based on the initial relative  
297 abundance and biofilm growth in mono-culture and is thus also a measure for the strength of  
298 competition. Complementarity is positive if some degree of niche separation occurs, for example if  
299 two species can grow on different resources or if one species is able to use a waste product of another  
300 species as a resource. Consequently, the strength of competition decreases and the productivity  
301 increases due to a more optimal use of the available niches. Positive complementarity was observed  
302 in 91,7% of the multispecies biofilm models. On the other hand, negative complementarity effects

303 occurred in the remaining 8,3% of the multispecies biofilm models and indicate the occurrence of  
304 strong chemical or physical interference competition (Fox, 2005; Turnbull *et al.*, 2013; Loreau, 2000).

305 The combination of complementarity and selection effects then gives an indication as to which  
306 ecological processes are the cause of the total positive or negative biodiversity effect. In our  
307 multispecies biofilm models positive biodiversity (75%), could be explained by resource partitioning  
308 or facilitation between the different species for 66,7% of the biofilms (only positive complementarity),  
309 by dominance of the best biofilm formers for 11,1% of the biofilms (only positive selection) or by a  
310 combination of both positive complementarity and selection for 22,2% of the biofilms. Conversely,  
311 negative biodiversity effects (25%), were caused by exploitation or interference competition for 33,3%  
312 of the biofilms (only negative complementary), by dominance of poor biofilm formers for 33,3% of the  
313 biofilms (only negative selection) or by a combination of negative complementarity and selection for  
314 33,3% of the biofilms (Loreau and de Mazancourt, 2013). Overall, the mainly positive complementarity  
315 effects indicate that the competitive interactions in the multispecies biofilm models are in most cases  
316 alleviated by partial niche separation.

### 317 **Link between reduced competition and antimicrobial tolerance in multispecies biofilms**

318 The results above show that competitive inter-species interactions, although in general alleviated by  
319 partial niche separation, strongly influence the productivity of each species in the multispecies  
320 biofilms. In a next step, we sought to investigate the interplay of these competitive interactions with  
321 antimicrobial treatment and their effect on antimicrobial tolerance. Hereto, sulfathiazole was added  
322 preventively to three multispecies biofilm models (Table 1). Tolerance to sulfathiazole is defined as  
323 the ratio between the amount of biofilm formed in the presence and absence of treatment and was  
324 determined for each species in mono- and co-culture conditions (Figure 4-6). In all three models the  
325 tolerance of each species was equal or higher in the multispecies biofilm than in the mono-culture.  
326 The result is an overall increase in tolerance in each multispecies biofilm, which can be seen by  
327 comparing the expected and observed amount of biofilm after treatment. Here the expected amount

328 is calculated based on the composition before treatment and the percentage of reduction of each  
329 species in mono-culture. These results are in line with the increased tolerance generally observed in  
330 multispecies biofilms (Mozina *et al.*, 2013; Burmølle *et al.*, 2014). Specifically, our results are  
331 consistent with a previous study on sulfathiazole treatment, in which multispecies biofilms isolated  
332 from cooling water systems were found to be more tolerant compared to their mono-culture  
333 counterparts (Shakeri *et al.*, 2007).

334 Table 1: Closest known relative genus for each of the species present in the three multispecies biofilm models  
335 that were used to study the inhibition by sulfathiazole

|         | Species 1              | Species 2                | Species 3         | Species 4       |
|---------|------------------------|--------------------------|-------------------|-----------------|
| Model 1 | <i>Epilithonimonas</i> | <i>Aeromonas</i>         |                   |                 |
| Model 2 | <i>Pseudomonas</i>     | <i>Pseudoclavibacter</i> | <i>Raoultella</i> | <i>Serratia</i> |
| Model 3 | <i>Pseudomonas</i>     | <i>Raoultella</i>        |                   |                 |

336  
337

338 Analyzing biofilm compositions before and after treatment revealed that the above described  
339 dominance of competitive interactions in untreated biofilms is central to the observed enhanced  
340 tolerance to antimicrobial treatment. In two out of three biofilm models we found that antimicrobial  
341 treatment reduced the level of competition and therefore caused a subset of species to bloom. The  
342 result was a lower percentage inhibition of these species in the multispecies biofilm compared to the  
343 mono-culture biofilms, which -per definition- appears as increased tolerance.

344 In duo-species model 1 (Figure 4), species 2 is sensitive to the inhibitor both in the mono- and  
345 co-culture biofilm (4 A&B). However, species 1, which is insensitive to the inhibitor in mono-culture,  
346 shows a 50-fold increase in growth upon addition of the inhibitor in the duo-species biofilm (4 A&B),  
347 resulting in an overall higher tolerance of the duo-species biofilm (4A). In the untreated duo-species  
348 biofilm, species 1 is strongly suppressed by species 2 as reflected in the strong competition (4C), large  
349 positive selection effect (4D) and negative complementarity (4D). The increased growth of species 1  
350 upon treatment is therefore consistent with an abrogation of the competitive interactions of sensitive  
351 species 2 against species 1, which then blooms and shows a net increase in antimicrobial tolerance.  
352 This is reflected in a reduced competition (4C), associated with a positive complementarity (4D) in the



353 treated biofilm. In summary, inhibition of the best competitor results in a bloom of the worse  
354 competitor and overall increased tolerance.

355 A similar mechanism plays in tetra-species model 2 (Figure 5). Three out of four species are  
356 completely inhibited both in the mono- and multispecies biofilm (5 A&B). Species 3, however, which  
357 is insensitive to the inhibitor in the monospecies biofilm, shows a 1.5-fold increase in growth upon  
358 addition of the inhibitor in the multispecies biofilm (5 A&B), resulting in an overall increase in  
359 tolerance of the mixed species biofilm (5A). Species 3 experiences competition by the other species in  
360 the untreated multispecies biofilm (5 C&D), explaining why inhibition of these other species increases  
361 the growth -and tolerance- of species 3 in the treated biofilm. Since there is only one species left after  
362 treatment, competition (5C) and biodiversity effect (5D) are zero.

363 It should be noted that this mechanism of ‘increased tolerance due to reduced competition’  
364 does not involve an increase in absolute cell numbers of the different species in co-culture compared  
365 to mono-culture, nor an expression of specific tolerance phenotypes. Nevertheless, the proposed  
366 mechanism is of significance. Indeed, similar to our study, antimicrobial tolerance in previous studies  
367 was generally measured by calculating the reduction in cell numbers before and after treatment, not  
368 by directly comparing the absolute cell numbers between co- and mono-culture conditions  
369 (Chorianopoulos *et al.*, 2008; Van der Veen & Abee, 2011; Kostaki *et al.*, 2012; Giaouris *et al.*, 2013;  
370 Wang *et al.*, 2013). Therefore, the increased tolerance observed in these studies might as well be  
371 explained by decreased competition and should not necessarily be accompanied by any changes in  
372 specific tolerance phenotypes.

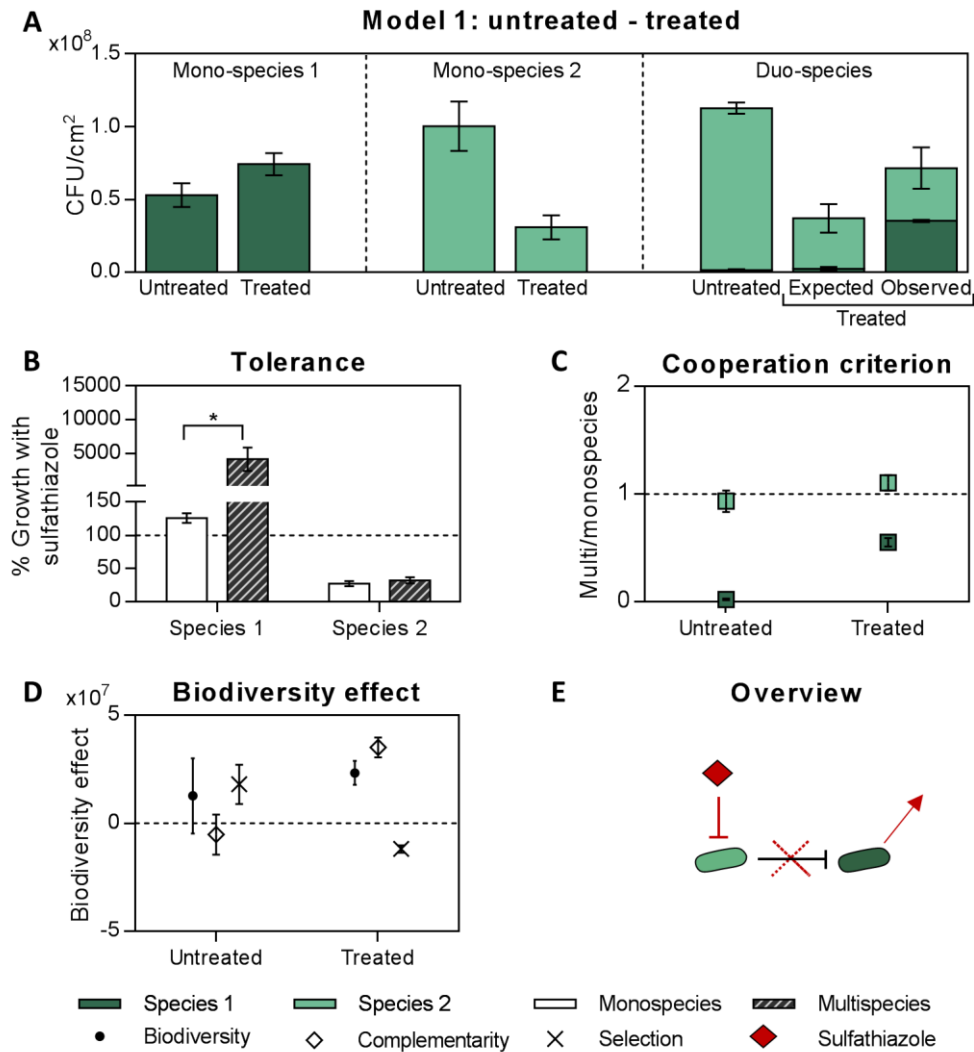

373  
374  
375  
376  
377  
378  
379  
380  
381  
382  
383  
384

**Figure 4 Model 1:** **A:** Number of cells of each species in mono- and co-culture biofilms, grown in the absence and presence of sulfathiazole treatment: suppressed species 1 is able to grow after treatment. **B:** Tolerance = ratio between the number of biofilm cells with and without sulfathiazole treatment, determined for each species in mono- and co-culture conditions. For each species the tolerance is equal or higher within the co-culture biofilm. Significant differences were examined using a two-way anova and Bonferroni correction (\* P<0.05) **C:** Cooperation: both in the absence and presence of treatment the criterion for cooperation is not met. **D:** Biodiversity effects in the absence and presence of treatment of the duo-species biofilm: dominating positive selection is replaced by positive complementarity. **E:** Overview: inhibition of species 2 leads to a reduction in the competitive interactions against species 1, which allows species 1 to bloom. Results show the average of 3 biological repeats, except for A, which shows the average of 3 technical repeats of one representative biological repeat.

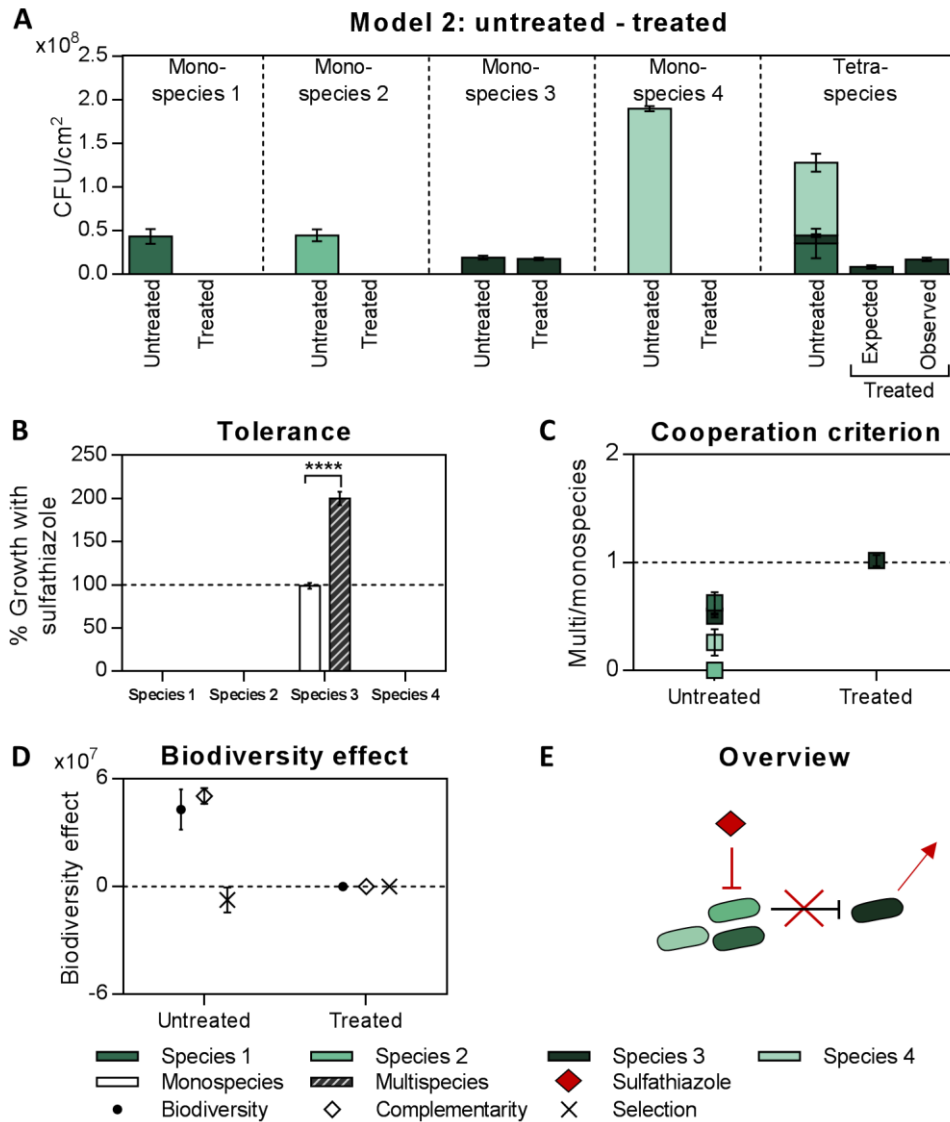

385

386 **Figure 5: Model 2: A:** Number of cells of each species in mono- and co-culture biofilms, grown in the absence  
 387 and presence of sulfathiazole treatment: suppressed species 3 shows an increased growth upon treatment. **B:**  
 388 Tolerance = ratio between the number of biofilm cells with and without sulfathiazole treatment, determined for  
 389 each species in mono- and co-culture conditions. Species 3 shows an increased the tolerance within the  
 390 multispecies biofilm, while species 1, 2 and 4 are completely inhibited in mono- and co-culture. Significant  
 391 differences were examined using a two-way anova and Bonferroni correction (\*\*\*\* P<0.0001). **C:** Cooperation:  
 392 both in the absence and presence of treatment the criterion for cooperation is not met. **D:** Biodiversity effects  
 393 in the absence and presence of treatment of the multispecies biofilm: negative complementarity becomes  
 394 positive. **E:** Overview: complete inhibition of species 1, 2 and 4 leads to the abrogation of competitive  
 395 interactions against species 3, which allows species 3 to bloom. Results show the average of 3 biological repeats,  
 396 except A, which shows the average of 3 technical repeats of one representative biological repeat.  
 397

398 **Direct effect of competitors on antimicrobial tolerance**

399 The findings above indicate that incomplete antimicrobial treatment of multispecies biofilms can  
400 reduce the levels of competition and therefore cause a subset of species to bloom, which ultimately  
401 results in increased antimicrobial tolerance. Complete inhibition of all species in the mixture would  
402 solve this problem. However, our analysis of duo-species model 3 (Figure 6) indicates that the  
403 presence of competing species can also directly enhance the inherent tolerance of other species by  
404 driving specific tolerance phenotypes. This means that antimicrobials that are completely effective  
405 against mono-culture biofilms are not necessarily effective against the same species in co-culture and  
406 thus precludes any prediction on multispecies tolerance.

407 In this duo-species model (Figure 6), both species respond to sulfathiazole treatment in the  
408 mono- and co-culture biofilms (6 A&B). However, species 1 shows a 11,1-fold reduction in sensitivity  
409 in co-culture, resulting in an overall increased tolerance of the co-culture biofilm (6A). In contrast to  
410 the previous model systems, this tolerance of species 1 is associated with an increase in cell number  
411 above the mono-culture levels (6A, right panel). These results cannot be explained by a decrease in  
412 competition alone (6C-D), and should be attributed to the presence of specific tolerance phenotypes  
413 within the multispecies biofilm. These could either be related to a protective effect of species 2 on  
414 species 1 or to a direct change in tolerance phenotype of species 1 as a response to species 2.

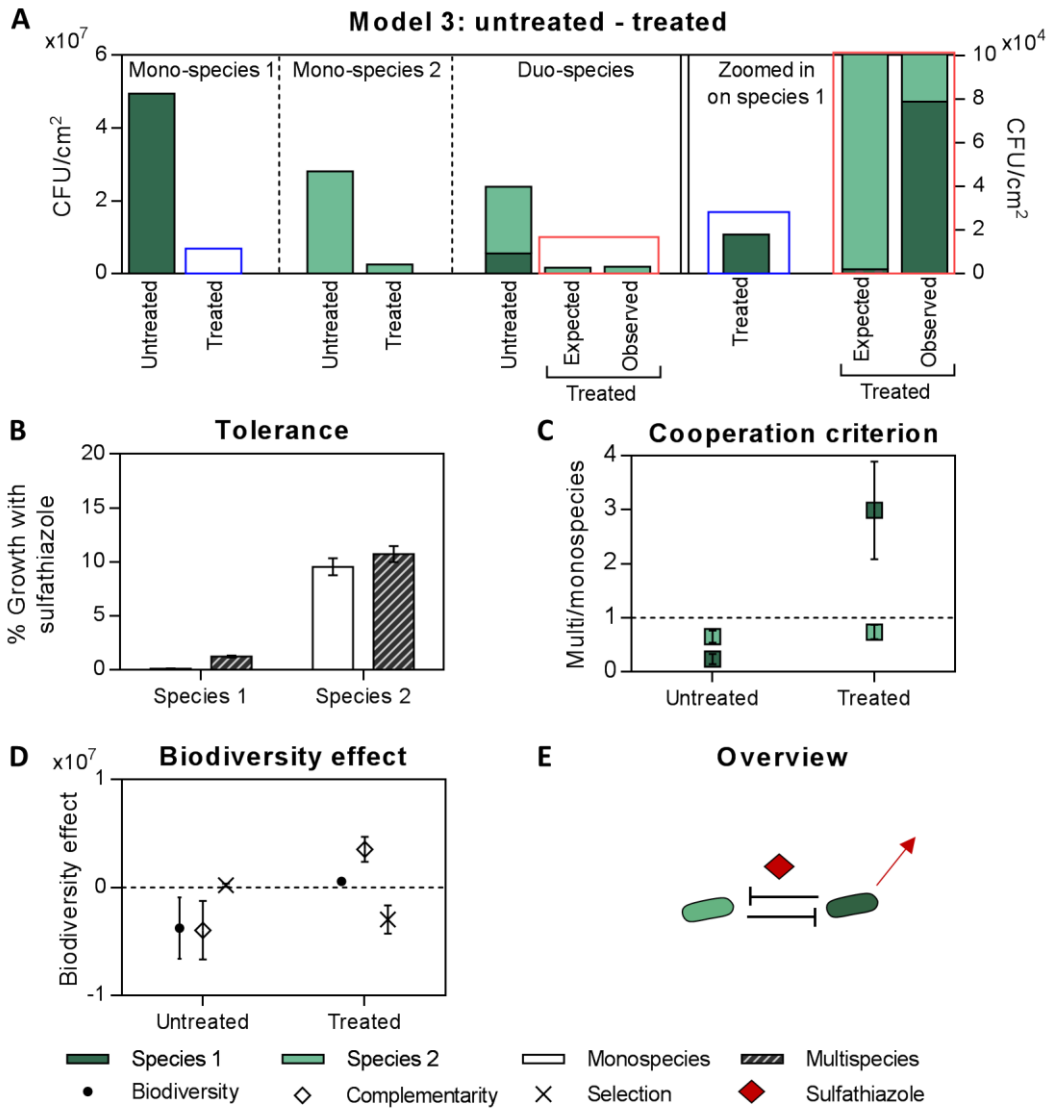

415

416 **Figure 6: Model 3: A:** Number of cells of each species in mono- and co-culture biofilms, grown in the absence  
417 and presence of sulfathiazole treatment. The right part of the graph zooms in on the amount of biofilm formed  
418 by species 1 in treated mono- and duo-culture: after treatment the growth of species 1 in duo-culture exceeds  
419 its growth in mono-culture. **B:** Tolerance = ratio between the number of biofilm cells with and without  
420 sulfathiazole treatment, determined for each species in mono- and co-culture conditions. Species 1 shows a  
421 higher tolerance within the co-culture biofilm, while there is no difference for species 2. **C:** Cooperation: after  
422 treatment species 1 grows better in co-culture than in mono-culture, while there is no difference for species 2.  
423 This is consistent with commensalism. **D:** Biodiversity effects in the absence and presence of treatment of the  
424 co-culture biofilm: negative complementarity before treatment becomes positive. **E:** Overview: species 1  
425 becomes more tolerant in the presence of competing species 2. The growth of species 1 in the treated co-culture  
426 biofilm even exceeds its mono-culture growth, suggesting induction of specific tolerance phenotypes Results  
427 show the average of 3 biological repeats, except A, which shows one representative biological.

428

429

## 430 **DISCUSSION**

431 Functional properties like antimicrobial tolerance strongly differ between multispecies and  
432 monospecies biofilm communities (Burmølle *et al.*, 2014; Røder *et al.*, 2016). Although inter-species  
433 interactions are expected to be both intense and important within dense communities (Elias and  
434 Banin, 2012), little is known about how they affect antimicrobial tolerance. Previous work either  
435 focused on microbial interactions in untreated biofilms (Tan *et al.*, 2016; Røder *et al.*, 2016; Ghoul and  
436 Mitri, 2016) or on the overall tolerance of multispecies biofilms, without taking contributions of  
437 individual species into account (Adam *et al.*, 2002; Burmølle *et al.*, 2006; Baffone *et al.*, 2011; Simões  
438 *et al.*, 2010; Lopes *et al.*, 2012). We have bridged the gap and shown that a complex interplay between  
439 antimicrobial treatment and inter-species interactions underlies the commonly-observed increased  
440 tolerance of multispecies biofilms. We have shown that competitive interactions dominate within  
441 industrially relevant multispecies biofilm models and that antimicrobial treatment, if incomplete, can  
442 reduce the level of competition and therefore cause subsets of species to bloom, ultimately leading  
443 to enhanced overall tolerance. In addition, we have shown that the presence of competitors can also  
444 directly enhance the inherent tolerance to antimicrobials by driving specific tolerance phenotypes.  
445 Overall, our results emphasize that the increasingly-recognized dominance of competition in  
446 multispecies biofilms is central to the enhanced antimicrobial tolerance and that antimicrobial  
447 activities against mono-culture biofilms cannot predict efficacy against multispecies biofilms.

448         Our data indicate that competitive interactions dominate among species within brewery  
449 biofilms, although inter-species competition is generally weaker than intraspecific competition. These  
450 data fit with a growing body of recent theoretic and experimental work motivating that competition,  
451 not cooperation, dominates interactions among microbial species. The genotypic view of social  
452 interactions predicts a low chance of evolution of cooperation between species, because this requires  
453 both a high within-genotype relatedness and sufficient niche separation to reduce ecological  
454 competition. Increased niche separation, however, often implies a decreased exchange of resources,

455 which counteracts interactions, and further complicates the evolution of cooperation (Mitri and  
456 Foster, 2013). These predictions are confirmed by recent systematic screenings of inter-species  
457 interactions based on the cooperation criterion (Foster and Bell, 2012; Rivett *et al.*, 2016; Fiegna *et*  
458 *al.*, 2015). Also in these studies inter-species competition was found to be weaker than intraspecific  
459 competition (Foster and Bell, 2012; Rivett *et al.*, 2016; Oliveira *et al.*, 2015; Fiegna *et al.*, 2015).  
460 Moreover, Rivett *et al.* (2016) showed that initially strong competitive interactions can weaken over  
461 time by divergence in resource use and increased niche complementarity. It should be noted that a  
462 number of studies did report a prevalence of positive interactions, however, these studies made use  
463 of alternative definitions. In a recent study, synergistic interactions were defined as the total amount  
464 of multispecies biofilm being higher than the sum of all mono-cultures and synergy was observed in  
465 13% of the biofilms (Madsen *et al.*, 2016). This definition is similar to the cooperation criterion, but  
466 since the effect of growth in co-culture on the individual species is not included, the presence of  
467 cooperative interactions cannot be confirmed. In earlier studies, synergy required the total amount of  
468 multispecies biofilm to be higher than that of the best mono-culture biofilm former and synergistic  
469 interactions were reported in respectively 11%, 63% and 30% of the biofilms (Burmølle *et al.*, 2007;  
470 Ren *et al.*, 2015; Røder *et al.*, 2015). Also here information on composition of the multispecies biofilm  
471 is needed to determine whether the described synergistic interactions are competitive or cooperative.  
472 It can however be deduced that these synergistic interactions are associated with a positive  
473 biodiversity effect, since both definitions imply the total amount of multispecies biofilm to be higher  
474 than the weighted average of the mono-cultures. Notably, this positive biodiversity effect does imply  
475 niche complementarity, but can also partly be caused by positive selection effects. In conclusion, the  
476 importance of competition among species over cooperation is increasingly recognized and our data  
477 are consistent with this. However, an important note is that all studies described above, including  
478 ours, are based on culturable species, which might exclude species that are only able to grow in the  
479 presence of other species. Therefore, the prevalence of cooperation might be underestimated (Foster  
480 and Bell, 2012; Røder *et al.*, 2016).

481           The enhanced overall antimicrobial tolerance against sulfathiazole that we observed for each  
482 multispecies biofilm model compared to the mono-culture biofilms is consistent with the enhanced  
483 resistance found in the majority of multispecies biofilm studies (Baffone *et al.*, 2011; Simões *et al.*,  
484 2010; Shakeri *et al.*, 2007; Kumar and Peng, 2015; Jagmann *et al.*, 2015; Adam *et al.*, 2002; Lopes *et al.*,  
485 2012; Leriche *et al.*, 2003; Whiteley *et al.*, 2001; Luppens *et al.*, 2008; Wang *et al.*, 2013; Schwering  
486 *et al.*, 2013; Van der Veen and Abee, 2011; Simões *et al.*, 2009; Harriott and Noverr, 2009; Lee *et al.*,  
487 2014; Hoffman *et al.*, 2006). In most of these studies the enhanced tolerance was attributed to  
488 protective effects of the species on each other, however, generally without unraveling the mechanism  
489 of tolerance. In contrast, a minority of studies did not observe an effect of multispecies conditions on  
490 antimicrobial tolerance (Gkana *et al.*, 2017) or did even measure a decrease in tolerance in  
491 multispecies conditions (Lindsay *et al.*, 2002; Chorianopoulos *et al.*, 2008; Kart *et al.*, 2014; Yassin *et al.*,  
492 2016; Feldman *et al.*, 2016).

493           Our data indicate that the commonly-observed enhanced antimicrobial tolerance of  
494 multispecies biofilms is associated with a reduction in the level of competition upon treatment,  
495 causing a subset of species to bloom. The dominance of competition among species over cooperation  
496 in untreated biofilms is therefore central to the enhanced antimicrobial tolerance. Indeed, incomplete  
497 inhibition of a network of cooperating species is expected, not to promote, but to pull down the  
498 remaining species because of abrogation of positive feedback loops, as is motivated by recent  
499 ecological network studies (Coyte *et al.*, 2015). This would reduce, not increase, the overall tolerance  
500 of the multispecies biofilm (Feldman *et al.*, 2016). Our models only provide examples of multispecies  
501 biofilms in which specific species strongly suppress other species. Inhibition of the stronger  
502 competitors consequently reduces the competition that is experienced by the suppressed species and  
503 leads to an increased tolerance of the weaker competitors. However, the idea that antimicrobial  
504 tolerance in multispecies biofilms is connected to a reduction in competition should not be limited to  
505 this situation, as one can easily imagine that antimicrobial treatment can also reduce competition  
506 between equal competitors. For example, in the case of equally competing species that only produce



507 their toxins when the population density of the other species is sufficiently high (Cornforth and Foster,  
508 2013), a reduction of the population size by antimicrobial treatment would interfere with toxin  
509 production, reduce competition and ultimately lead to increased antimicrobial tolerance compared to  
510 mono-culture.

511         Based on the commonly found prevalence of competitive interactions within multispecies  
512 biofilms, it is expected that reduction in competition might often be the cause of increased tolerance.  
513 However, little is known about this because previous work mainly focused on characterizing the  
514 antimicrobial tolerance of mono- and multispecies biofilms, without explicitly classifying the changes  
515 in inter-species interactions before and after treatment. In a number of studies, only the overall  
516 activity against the multispecies biofilm and the activity against the mono-cultures was measured,  
517 while information on individual species in co-culture is essential to understand the inter-species  
518 interactions (Adam *et al.*, 2002; Burmølle *et al.*, 2006; Baffone *et al.*, 2011; Simões *et al.*, 2010; Lopes  
519 *et al.*, 2012). Similarly, only determining the inhibition of each species in the co-culture without looking  
520 at the effects in mono-culture (Norwood and Gilmour, 2000; Hill *et al.*, 2010; DeLeon *et al.*, 2014; Sun  
521 *et al.*, 2008; Feldman *et al.*, 2016) or only focusing on specific species within the multispecies biofilm  
522 (Kumar and Peng, 2015; Jagmann *et al.*, 2015; Shakeri *et al.*, 2007) does not allow to study all changes  
523 in inter-species interactions. Nevertheless, a few studies have been conducted in which the tolerance  
524 of each species was examined individually, both under mono- and co-culture biofilm conditions  
525 (Harriott and Noverr, 2009; Van der Veen and Abee, 2011; Simões *et al.*, 2009; Whiteley *et al.*, 2001;  
526 Leriche *et al.*, 2003; Luppens *et al.*, 2008; Wang *et al.*, 2013; Schwering *et al.*, 2013; Elvers *et al.*, 2002).  
527 While the obtained data would allow to perform a detailed analysis of the changes in inter-species  
528 interactions as proposed in this paper, this analysis is generally missing and the representation of the  
529 data in most cases did not allow us to interpret the data a posteriori. Nevertheless, one study on  
530 tolerance of a 7-species biofilm provided sufficient data and is consistent with our mechanism of  
531 ‘increased tolerance due to reduced competition’ (Elvers *et al.*, 2002). Some of the bacterial species  
532 experienced a reduced growth due to competition in the untreated multispecies biofilm, while

533 antimicrobial treatment restored their growth in the multispecies biofilm to the level of the untreated  
534 monoculture biofilms. In contrast, but also consistent with our rationale, a reduction in antimicrobial  
535 tolerance under multispecies conditions has been explicitly associated with a reduction of (probably  
536 rare) cooperative inter-species interactions (Feldman *et al.*, 2016).

537         In our final model, we found that the presence of competitors can also directly enhance the  
538 inherent tolerance of other species by driving specific tolerance phenotypes. This could either be  
539 attributed to (i) protective effects of specific species on other species or to (ii) direct changes in  
540 tolerance phenotypes of specific species as a response to competitors. A previously described example  
541 of a protective effect occurs between competing *Pseudomonas aeruginosa* and *Staphylococcus aureus*  
542 species (Hoffman *et al.* 2006). Respiration of *S. aureus* was found to be inhibited by a competitive  
543 interaction involving the exoproduct 4-hydroxy-2-heptylquinoline-N-oxide of *P. aeruginosa*. As a  
544 consequence, aminoglycoside antibiotics were no longer taken up by *S. aureus* cells and their  
545 tolerance to these antibiotics increased. Additionally, the presence of *P. aeruginosa* on a long term  
546 increased the production of highly resistant small-colony variants of *S. aureus*, which further improved  
547 the antimicrobial tolerance of *S. aureus*. In addition, it is becoming increasingly clear that bacteria can  
548 also directly sense the presence of competitors and respond appropriately (i.e. ‘competition sensing’)  
549 (Cornforth and Foster, 2013). Recent studies indicate that these responses can include upregulated  
550 biofilm formation (Oliveira *et al.*, 2015), increased antibiotics or toxin production (Le Roux *et al.*, 2015;  
551 Abrudan *et al.*, 2015; Rosenberg *et al.*, 2016), altered secretion of specific secondary metabolites  
552 (Traxler *et al.*, 2013), but also increased antibiotic tolerance (Abrudan *et al.*, 2015; Roberfroid *et al.*,  
553 personal communication).

554         In conclusion, due to the their commonly observed increased antimicrobial tolerance,  
555 multispecies biofilms remain challenging to eradicate. Accordingly, we found multispecies biofilms to  
556 be a serious problem in breweries, as emphasized by the high microbial load of the isolated biofilm  
557 samples, both before and after CIP. An increased knowledge of the properties of these multispecies

558 biofilms may aid to improve their control. Our study demonstrates that competitive inter-species  
559 interactions dominate within multispecies biofilms and have a strong influence on the outcome of  
560 antimicrobial treatment. Specifically, we found that strongly suppressed species can bloom after  
561 inhibition of superior competitors by antimicrobial treatment, which results in increased tolerance. To  
562 avoid such unwanted effects of changing inter-species interactions, it would be useful to develop  
563 combination therapies that completely inhibit all species. Nevertheless, we also observed that the  
564 presence of competitors can increase the intrinsic tolerance of species by driving specific tolerance  
565 phenotypes. This means that antimicrobials that are completely effective against mono-culture  
566 biofilms are not necessarily effective against the same species in co-culture. Our study therefore  
567 underlines the need to further investigate and interfere with the mechanisms behind these specific  
568 tolerance phenotypes.

569

#### 570 **ACKNOWLEDGEMENTS**

571 We would like to thank Stijn Robijns, Sandra Van Puyvelde and Bram Lories for their valuable  
572 comments and for their assistance in sampling of brewery biofilms. We thank K. Deflem and D. De  
573 Coster for experimental assistance. This work was supported by the KU Leuven Research Fund  
574 (STG/16/022), by the Institute for the Promotion of Innovation through Science and Technology in  
575 Flanders under grant IWT-SBO 120050 (NEMOA) and by FWO-Vlaanderen (W0.009.16N). IP is a  
576 research assistant of the IWT-Vlaanderen (SB/131721). HS acknowledges the receipt of a postdoctoral  
577 fellowship from FWO-Vlaanderen (PDO/11).

578 **REFERENCES**

- 579 Abrudan MI, Smakman F, Grimbergen AJ, Westhoff S, Miller EL, van Wezel GP, *et al.* (2015). Socially  
580 mediated induction and suppression of antibiosis during bacterial coexistence. *Proc Natl Acad Sci U S*  
581 *A* **112**: 11054–11059.
- 582 Adam B, Baillie GS, Douglas LJ. (2002). Mixed species biofilms of *Candida albicans* and  
583 *Staphylococcus epidermidis*. *J Med Microbiol* **51**: 344–349.
- 584 Antoniani D, Bocci P, Maciag A, Raffaelli N, Landini P. (2010). Monitoring of diguanylate cyclase  
585 activity and of cyclic-di-GMP biosynthesis by whole-cell assays suitable for high-throughput  
586 screening of biofilm inhibitors. *Appl Microbiol Biotechnol* **85**: 1095–104.
- 587 Baffone W, Sorgente G, Campana R, Patrone V, Sisti D, Falcioni T. (2011). Comparative effect of  
588 chlorhexidine and some mouthrinses on bacterial biofilm formation on titanium surface. *Curr*  
589 *Microbiol* **62**: 445–451.
- 590 Barraud N, Hassett DJ, Hwang S-H, Rice SA, Kjelleberg S, Webb JS. (2006). Involvement of nitric oxide  
591 in biofilm dispersal of *Pseudomonas aeruginosa*. *J Bacteriol* **188**: 7344–53.
- 592 Burmølle M, Hansen LH, Sørensen SJ. (2007). Establishment and early succession of a multispecies  
593 biofilm composed of soil bacteria. *Microb Ecol* **54**: 352–362.
- 594 Burmølle M, Ren D, Bjarnsholt T, Sørensen SJ. (2014). Interactions in multispecies biofilms: do they  
595 actually matter? *Trends Microbiol* **22**: 84–91.
- 596 Burmølle M, Webb JS, Rao D, Hansen LH, Sørensen SJ, Kjelleberg S. (2006). Enhanced biofilm  
597 formation and increased resistance to antimicrobial agents and bacterial invasion are caused by  
598 synergistic interactions in multispecies biofilms. *Appl Environ Microbiol* **72**: 3916–23.
- 599 Cai H, Archambault M, Prescott JF. (2003). 16S Ribosomal RNA Sequence--Based Identification of  
600 Veterinary Clinical Bacteria. *J Vet Diagnostic Investig* **15**: 465–469.

- 601 Cardinale BJ, Wright JP, Cadotte MW, Carroll IT, Hector A, Srivastava DS, *et al.* (2007). Impacts of  
602 plant diversity on biomass production increase through time because of species complementarity.  
603 *Proc Natl Acad Sci U S A* **104**: 18123–8.
- 604 Ceri H, Olson ME, Stremick C, Read RR, Morck D, Buret A. (1999). The Calgary Biofilm Device: new  
605 technology for rapid determination of antibiotic susceptibilities of bacterial biofilms. *J Clin Microbiol*  
606 **37**: 1771–6.
- 607 Chorianopoulos NG, Giaouris ED, Skandamis PN, Haroutounian SA, Nychas GJE. (2008). Disinfectant  
608 test against monoculture and mixed-culture biofilms composed of technological, spoilage and  
609 pathogenic bacteria: bactericidal effect of essential oil and hydrosol of *Satureja thymbra* and  
610 comparison with standard acid-base sanitizers. *J Appl Microbiol* **104**: 1586–1596.
- 611 Cornforth DM, Foster KR. (2013). Competition sensing: the social side of bacterial stress responses.  
612 *Nat Rev Microbiol* **11**: 285–93.
- 613 Cotter PA, Stibitz S. (2007). c-di-GMP-mediated regulation of virulence and biofilm formation. *Curr*  
614 *Opin Microbiol* **10**: 17–23.
- 615 Coyte KZ, Schluter J, Foster KR. (2015). The ecology of the microbiome: Networks, competition, and  
616 stability. *Science (80- )* **350**: 663–666.
- 617 DeLeon S, Clinton A, Fowler H, Everett J, Horswill AR, Rumbaugh KP. (2014). Synergistic interactions  
618 of *Pseudomonas aeruginosa* and *Staphylococcus aureus* in an In vitro wound model. *Infect Immun*  
619 **82**: 4718–4728.
- 620 Elias S, Banin E. (2012). Multi-species biofilms: living with friendly neighbors. *FEMS Microbiol Rev* **36**:  
621 990–1004.
- 622 Elvers KT, Leeming K, Lappin-Scott HM. (2002). Binary and mixed population biofilms: time-lapse  
623 image analysis and disinfection with biocides. *J Ind Microbiol Biotechnol* **29**: 331–338.

- 624 Feldman M, Ginsburg I, Al-Quntar A, Steinberg D. (2016). Thiazolidinedione-8 Alters Symbiotic  
625 Relationship in *C. albicans*-*S. mutans* Dual Species Biofilm. *Front Microbiol* **7**: 140.
- 626 Fiegna F, Moreno-Letelier A, Bell T, Barraclough TG. (2015). Evolution of species interactions  
627 determines microbial community productivity in new environments. *ISME J* **9**: 1235–1245.
- 628 Foster KR, Bell T. (2012). Competition, not cooperation, dominates interactions among culturable  
629 microbial species. *Curr Biol* **22**: 1845–50.
- 630 Fox JW. (2005). Interpreting the ‘selection effect’ of biodiversity on ecosystem function. *Ecol Lett* **8**:  
631 846–856.
- 632 Ghoul M, Mitri S. (2016). The Ecology and Evolution of Microbial Competition. *Trends Microbiol* **24**:  
633 833–845.
- 634 Giaouris E, Chorianopoulos N, Doulgeraki A, Nychas GJ. (2013). Co-Culture with *Listeria*  
635 monocytogenes within a Dual-Species Biofilm Community Strongly Increases Resistance of  
636 *Pseudomonas putida* to Benzalkonium Chloride. *PLoS One* **8**: 1–14.
- 637 Gkana EN, Giaouris ED, Doulgeraki AI, Kathariou S, Nychas GJE. (2017). Biofilm formation by  
638 *Salmonella* Typhimurium and *Staphylococcus aureus* on stainless steel under either mono- or dual-  
639 species multi-strain conditions and resistance of sessile communities to sub-lethal chemical  
640 disinfection. *Food Control* **73**: 838–846.
- 641 Hall-Stoodley L, Costerton JW, Stoodley P. (2004). Bacterial biofilms: from the natural environment  
642 to infectious diseases. *Nat Rev Microbiol* **2**: 95–108.
- 643 Harcombe W. (2010). Novel cooperation experimentally evolved between species. *Evolution* **64**:  
644 2166–72.
- 645 Harriott MM, Noverr MC. (2009). *Candida albicans* and *Staphylococcus aureus* form polymicrobial  
646 biofilms: Effects on antimicrobial resistance. *Antimicrob Agents Chemother* **53**: 3914–3922.

- 647 Hengge R. (2009). Principles of c-di-GMP signalling in bacteria. *Nat Rev Microbiol* **7**: 263–273.
- 648 Hill KE, Malic S, McKee R, Rennison T, Harding KG, Williams DW, *et al.* (2010). An in vitro model of  
649 chronic wound biofilms to test wound dressings and assess antimicrobial susceptibilities. *J*  
650 *Antimicrob Chemother* **65**: 1195–1206.
- 651 Hoffman LR, Déziel E, D’Argenio D a, Lépine F, Emerson J, McNamara S, *et al.* (2006). Selection for  
652 *Staphylococcus aureus* small-colony variants due to growth in the presence of *Pseudomonas*  
653 *aeruginosa*. *Proc Natl Acad Sci U S A* **103**: 19890–19895.
- 654 Jagmann N, Henke SF, Philipp B. (2015). Cells of *Escherichia coli* are protected against severe  
655 chemical stress by co-habiting cell aggregates formed by *Pseudomonas aeruginosa*. *Appl Microbiol*  
656 *Biotechnol* **99**: 8285–8294.
- 657 Kart D, Tavernier S, Van Acker H, Nelis HJ, Coenye T. (2014). Activity of disinfectants against  
658 multispecies biofilms formed by *Staphylococcus aureus*, *Candida albicans* and *Pseudomonas*  
659 *aeruginosa*. *Biofouling* **30**: 377–383.
- 660 Kelsic ED, Zhao J, Vetsigian K, Kishony R. (2015). Counteraction of antibiotic production and  
661 degradation stabilizes microbial communities. *Nature* **521**: 516–519.
- 662 Kim W, Racimo F, Schluter J, Levy SB, Foster KR. (2014). Importance of positioning for microbial  
663 evolution. *Proc Natl Acad Sci U S A* **111**: E1639-47.
- 664 Kostaki M, Chorianopoulos N, Braxou E, Nychas GJ, Giaouris E. (2012). Differential biofilm formation  
665 and chemical disinfection resistance of sessile cells of *Listeria monocytogenes* strains under  
666 monospecies and dual-species (with *Salmonella enterica*) conditions. *Appl Environ Microbiol* **78**:  
667 2586–2595.
- 668 Kumar A, Peng TY. (2015). Presence of *Pseudomonas aeruginosa* influences biofilm formation and  
669 surface protein expression of *Staphylococcus aureus*. *Environ Microbiol* **17**: 4459–4468.

- 670 Lee KWK, Periasamy S, Mukherjee M, Xie C, Kjelleberg S, Rice S a. (2014). Biofilm development and  
671 enhanced stress resistance of a model, mixed-species community biofilm. *ISME J* **8**: 894–907.
- 672 Leriche V, Briandet R, Carpentier B. (2003). Ecology of mixed biofilms subjected daily to a chlorinated  
673 alkaline solution: spatial distribution of bacterial species suggests a protective effect of one species  
674 to another. *Environ Microbiol* **5**: 64–71.
- 675 Lindsay D, Brözel VS, Mostert JF, Von Holy A. (2002). Differential efficacy of a chlorine dioxide-  
676 containing sanitizer against single species and binary biofilms of a dairy-associated *Bacillus cereus*  
677 and a *Pseudomonas fluorescens* isolate. *J Appl Microbiol* **92**: 352–361.
- 678 Lopes SP, Ceri H, Azevedo NF, Pereira MO. (2012). Antibiotic resistance of mixed biofilms in cystic  
679 fibrosis: impact of emerging microorganisms on treatment of infection. *Int J Antimicrob Agents* **40**:  
680 260–263.
- 681 Loreau M. (2000). Biodiversity and ecosystem functioning: recent theoretical advances. *Oikos* **91**: 3–  
682 17.
- 683 Loreau M, Hector A. (2001). Partitioning selection and complementarity in biodiversity experiments.  
684 *Nature* **412**: 72–6.
- 685 Loreau M, de Mazancourt C. (2013). Biodiversity and ecosystem stability: a synthesis of underlying  
686 mechanisms. *Ecol Lett* **16**: 106–115.
- 687 Lories B, Parijs I, Foster KR, Steenackers HP. (2017) Meeting report on the ASM Conference on  
688 Mechanisms of Interbacterial Cooperation and Competition. *J Bacteriol.* (in press)
- 689 Luppens SBI, Kara D, Bandounas L, Jonker MJ, Wittink FR a, Bruning O, *et al.* (2008). Effect of  
690 *Veillonella parvula* on the antimicrobial resistance and gene expression of *Streptococcus mutans*  
691 grown in a dual-species biofilm. *Oral Microbiol Immunol* **23**: 183–9.
- 692 Lynch AS, Abbanat D. (2010). New antibiotic agents and approaches to treat biofilm-associated



- 693 infections. *Expert Opin Ther Pat* **20**: 1373–87.
- 694 Madsen JS, Røder HL, Russel J, Sørensen H, Burmølle M, Sørensen SJ. (2016). Coexistence facilitates  
695 interspecific biofilm formation in complex microbial communities. *Environ Microbiol* **18**: 2565–2574.
- 696 Maifreni M, Frigo F, Bartolomeoli I, Buiatti S, Picon S, Marino M. (2015). Bacterial biofilm as a  
697 possible source of contamination in the microbrewery environment. *Food Control* **50**: 809–814.
- 698 Mamvura T, Iyuke S. (2011). Soil Films in the Beverage Industry: A Review. *J Inst Brew* **117**: 608–616.
- 699 Mitri S, Foster KR. (2013). The genotypic view of social interactions in microbial communities. *Annu*  
700 *Rev Genet* **47**: 247–73.
- 701 Morin X, Fahse L, Scherer-Lorenzen M, Bugmann H. (2011). Tree species richness promotes  
702 productivity in temperate forests through strong complementarity between species. *Ecol Lett* **14**:  
703 1211–1219.
- 704 Mozina SS, Klancknik A, Raspor P. (2013). Mechanisms of microbial resistance in biofilms. In: *Biofilms*  
705 *in Bioengineering*. pp 311–332.
- 706 Nithya C, Devi MG, Karutha Pandian S. (2011). A novel compound from the marine bacterium  
707 *Bacillus pumilus* S6-15 inhibits biofilm formation in gram-positive and gram-negative species.  
708 *Biofouling* **27**: 519–28.
- 709 Norwood DE, Gilmour A. (2000). The growth and resistance to sodium hypochlorite of *Listeria*  
710 *monocytogenes* in a steady-state multispecies biofilm. *J Appl Microbiol* **88**: 512–520.
- 711 Oliveira NM, Martinez-Garcia E, Xavier J, Durham WM, Kolter R, Kim W, *et al.* (2015). Biofilm  
712 formation as a response to ecological competition. *PLoS Biol* **13**: 1–23.
- 713 Opperman TJ, Kwasny SM, Williams JD, Khan AR, Peet NP, Moir DT, *et al.* (2009). Aryl rhodanines  
714 specifically inhibit staphylococcal and enterococcal biofilm formation. *Antimicrob Agents Chemother*  
715 **53**: 4357–67.

- 716 Pfeiffer T, Schuster S, Bonhoeffer S. (2001). Cooperation and Competition in the Evolution of ATP-  
717 Producing Pathways. *Science (80- )* **292**: 504–507.
- 718 Polley HW, Wilsey BJ, Derner JD. (2003). Do species evenness and plant density influence the  
719 magnitude of selection and complementarity effects in annual plant species mixtures? *Ecol Lett* **6**:  
720 248–256.
- 721 Rakoff-Nahoum S, Foster KR, Comstock LE. (2016). The evolution of cooperation within the gut  
722 microbiota. *Nature* **533**: 255–259.
- 723 Ren D, Madsen JS, Sørensen SJ, Burmølle M. (2015). High prevalence of biofilm synergy among  
724 bacterial soil isolates in cocultures indicates bacterial interspecific cooperation. *ISME J* **9**: 81–89.
- 725 Riley MA, Gordon DM. (1999). The ecological role of bacteriocins in bacterial competition. *Trends*  
726 *Microbiol* **7**: 129–133.
- 727 Rivett DW, Scheuerl T, Culbert CT, Mombrikotb SB, Johnstone E, Barraclough TG, *et al.* (2016).  
728 Resource-dependent attenuation of species interactions during bacterial succession. *ISME J* **10**:  
729 2259–2268.
- 730 Røder HL, Raghupathi PK, Herschend J, Brejnrod A, Knøchel S, Sørensen SJ, *et al.* (2015). Interspecies  
731 interactions result in enhanced biofilm formation by co-cultures of bacteria isolated from a food  
732 processing environment. *Food Microbiol* **51**: 18–24.
- 733 Røder HL, Sørensen SJ, Burmølle M. (2016). Studying Bacterial Multispecies Biofilms: Where to Start?  
734 *Trends Microbiol* **24**: 503–513.
- 735 Romling U, Galperin MY, Gomelsky M. (2013). Cyclic di-GMP: the first 25 years of a universal  
736 bacterial second messenger. *Microbiol Mol Biol Rev* **77**: 1–52.
- 737 Rosenberg G, Steinberg N, Oppenheimer-shaanan Y, Olender T, Doron S, Ben-ari J. (2016). Not so  
738 simple , not so subtle : the interspecies competition between *Bacillus simplex* and *Bacillus subtilis*

739 and its impact on the evolution of biofilms. *Biofilms and Microbiomes* **2**: 1–11.

740 Le Roux M, Kirkpatrick RL, Montauti EI, Tran BQ, Brook Peterson S, Harding BN, *et al.* (2015). Kin cell  
741 lysis is a danger signal that activates antibacterial pathways of *Pseudomonas aeruginosa*. *Elife* **2015**:  
742 1–65.

743 Russell AB, Peterson SB, Mougous JD. (2014). Type VI secretion system effectors: poisons with a  
744 purpose. *Nat Rev Microbiol* **12**: 137–148.

745 Scholz RL, Greenberg EP. (2015). Sociality in *Escherichia coli*: Enterochelin is a private good at low  
746 cell density and can be shared at high cell density. *J Bacteriol* **197**: 2122–2128.

747 Schwering M, Song J, Louie M, Turner RJ, Ceri H. (2013). Multi-species biofilms defined from drinking  
748 water microorganisms provide increased protection against chlorine disinfection. *Biofouling* **29**:  
749 917–28.

750 Shakeri S, Kermanshahi RK, Moghaddam MM, Emtiazi G. (2007). Assessment of biofilm cell removal  
751 and killing and biocide efficacy using the microtiter plate test. *Biofouling* **23**: 79–86.

752 Simões LC, Simões M, Vieira MJ. (2010). Influence of the diversity of bacterial isolates from drinking  
753 water on resistance of biofilms to disinfection. *Appl Environ Microbiol* **76**: 6673–6679.

754 Simões M, Simões LC, Vieira MJ. (2009). Species association increases biofilm resistance to chemical  
755 and mechanical treatments. *Water Res* **43**: 229–237.

756 Spehn EM, Hector A, Joshi J, Scherer-Lorenzen M, Schmid B, Bazeley-White E, *et al.* (2005).  
757 Ecosystem effects of biodiversity manipulations in European grasslands. *Ecol Monogr* **75**: 37–63.

758 Stoodley P, Sauer K, Davies DG, Costerton JW. (2002). Biofilms as complex differentiated  
759 communities. *Annu Rev Microbiol* **56**: 187–209.

760 Storgards E, Tapani K. (2006). Microbial attachment and biofilm formation in brewery bottling  
761 plants. *Am Soc Brew Chem* **64**: 8–15.

- 762 Sun Y, Dowd SE, Smith E, Rhoads DD, Wolcott RD. (2008). In vitro multispecies Lubbock chronic  
763 wound biofilm model. *Wound Repair Regen* **16**: 805–13.
- 764 Tan CH, Kelvin Lee KW, Burmølle M, Kjelleberg S, Rice SA, Lee KWK, *et al.* (2016). All Together Now:  
765 Experimental Multispecies Biofilm Model Systems. *Environ Microbiol* **13**: 385–392.
- 766 Traxler MF, Watrous JD, Alexandrov T, Dorrestein PC, Kolter R. (2013). Interspecies interactions  
767 stimulate diversification of the *Streptomyces coelicolor* secreted metabolome. *MBio* **4**: 1–12.
- 768 Turnbull LA, Levine JM, Loreau M, Hector A. (2013). Coexistence, niches and biodiversity effects on  
769 ecosystem functioning. *Ecol Lett* **16**: 116–127.
- 770 Van der Veen S, Abee T. (2011). Mixed species biofilms of *Listeria monocytogenes* and *Lactobacillus*  
771 *plantarum* show enhanced resistance to benzalkonium chloride and peracetic acid. *Int J Food*  
772 *Microbiol* **144**: 421–431.
- 773 Wang R, Kalchayanand N, Schmidt JW, Haray DM. (2013). Mixed Biofilm Formation by Shiga Toxin-  
774 Producing *Escherichia coli* and *Salmonella enterica* Serovar Typhimurium Enhanced Bacterial  
775 Resistance to Sanitization due to Extracellular Polymeric Substances. *J Food Prot* **76**: 1513–1522.
- 776 West SA, Griffin AS, Gardner A. (2007). Social semantics: Altruism, cooperation, mutualism, strong  
777 reciprocity and group selection. *J Evol Biol* **20**: 415–432.
- 778 White TJ, Bruns S, Lee S, Taylor J. (1990). Amplification and direct sequencing of fungal ribosomal  
779 RNA genes for phylogenetics. *PCR Protoc A Guid to Methods Appl* 315–322.
- 780 Whiteley M, Ott JR, Weaver EA, McLean RJC. (2001). Effects of community composition and growth  
781 rate on aquifer biofilm bacteria and their susceptibility to betadine disinfection. *Environ Microbiol* **3**:  
782 43–52.
- 783 Yassin SA, German MJ, Rolland SL, Rickard AH, Jakubovics NS. (2016). Inhibition of multispecies  
784 biofilms by a fluoride-releasing dental prosthesis copolymer. *J Dent* **48**: 62–70.
